# Supplementary material for: Insulin-Degrading Enzyme Interacts with Mitochondrial Ribosomes and Respiratory Chain Proteins
Source: Biomolecules. 2023 May 26;13(6):890. doi: 10.3390/biom13060890 (PMC10296325; doi:10.3390/biom13060890)
Supplement: Supplementary file 1 [file biomolecules-13-00890-s001.zip › biomolecules-2390776-supplementary.pdf]

Table S1: Primers and reagents used

**Primers**

|                                   |                                                     |
|-----------------------------------|-----------------------------------------------------|
| Mito-IDE forward ( <b>XhoI</b> )  | 5' GAAGT <b>CTCGAG</b> GCCACCATGCGGTACCGGCTAGCGG 3' |
| Mito-IDE reverse ( <b>EcoRI</b> ) | 5' CCACGCTT <b>GAATTC</b> GGTCATG 3'                |
| Linker Forward ( <b>SmaI</b> )    | 5' AGAG <b>CCCGGG</b> AGCGCCGGCAGCGCCGGCAAG 3'      |
| TurboID Reverse ( <b>MluI</b> )   | 5' GCCAGA <b>ACGCGT</b> CCCGTCCAG 3'                |

| Reagent or Resource | Source | Identifier |
|---------------------|--------|------------|
|---------------------|--------|------------|

**Antibody**

|                             |                           |            |
|-----------------------------|---------------------------|------------|
| Anti-IDE (polyclonal)       | Abcam                     | ab32216    |
| Anti-IDE (monoclonal)       | Santa Cruz Biotechnology  | sc-393887  |
| V5 Tag (monoclonal)         | Invitrogen                | R96025     |
| TOM20 (polyclonal)          | Proteintech               | 11802-1-AP |
| Anti-OVA (polyclonal)       | Polysciences              | 23744-5    |
| Anti-rabbit IgG, HRP linked | Cell signaling Technology | 7074       |
| Anti-mouse IgG, HRP linked  | Cell signaling Technology | 7076       |

**Chemicals**

|                                                              |                          |             |
|--------------------------------------------------------------|--------------------------|-------------|
| NucleoBond Xtra Midi EF<br>DMEM                              | Macherey-Nagel           | 740420.10   |
| Biotin                                                       | Sigma-Aldrich            | B4501       |
| Complete EDTA-free protease<br>inhibitors                    | Roche Diagnostic         | 11873580001 |
| NuPage 4-12% Bis-Tris Gel                                    | Thermo Fisher Scientific | NP0322BOX   |
| iBlot2 PVDF Mini Stacks                                      | Thermo Fisher Scientific | IB24002     |
| Streptavidin HRP                                             | BD Biosciences           | 554066      |
| SuperSignal <sup>TM</sup> West Pico PLUS<br>Chemiluminescent | Thermo Fisher Scientific | 34580       |
| BLUeye Prestained Protein Ladder                             | Sigma                    | 94964       |
| NuPage reducing agent                                        | Thermo Fisher Scientific | NP0004      |
| 4x Laemmli sample buffer                                     | BioRad                   | 1610747     |
| VECTASHIELD <sup>®</sup> PLUS Antifade<br>Mounting Medium    | Eurobio Scientific       | H-1900-10   |

**Software**

|                     |                        |                                                                                 |
|---------------------|------------------------|---------------------------------------------------------------------------------|
| Icy                 | Icy community platform | <a href="https://icy.bioimageanalysis.org">https://icy.bioimageanalysis.org</a> |
| String              | String consortium      | <a href="https://string-db.org/">https://string-db.org/</a>                     |
| Metascape           | Metascape              | <a href="https://metascape.org">https://metascape.org</a>                       |
| Affinity designer 2 | Serif Ltd              | <a href="https://affinity.serif.com">https://affinity.serif.com</a>             |

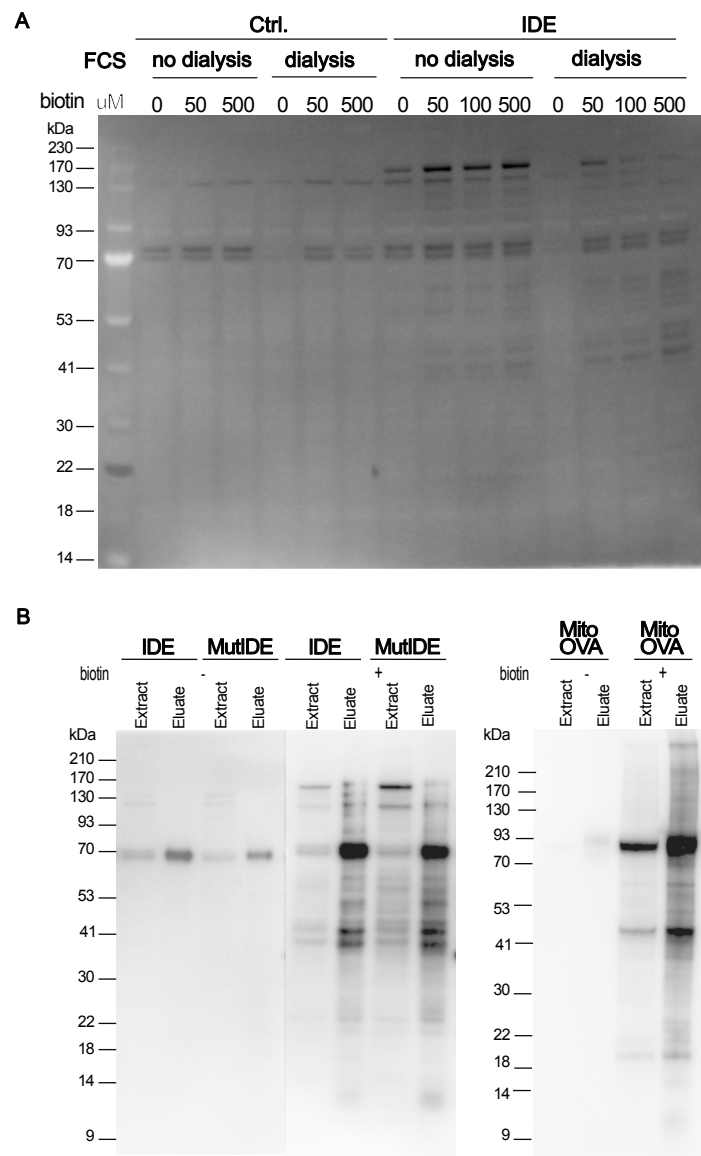

**Figure S1. Characterization of biotinylation activity TurboID fusion proteins.**

**(A)** Hek293T cells stably expressing IDE-TurboID fusion proteins and untransduced cells (Ctrl) were cultured in presence of non-dialyzed or dialyzed FCS before treatment with various concentrations of biotin for 10 min. Whole-cell lysates (10  $\mu$ g) were analyzed by streptavidin-HRP immunoblotting. **(B)** Immunoblot analysis of biotinylated proteins in total extracts and after enrichment using streptavidin beads, of cells expressing IDE (left) or OVA (right) fusion proteins and incubated for 10 min with 50  $\mu$ M biotin or buffer control. One representative out of four independent experiments is shown.

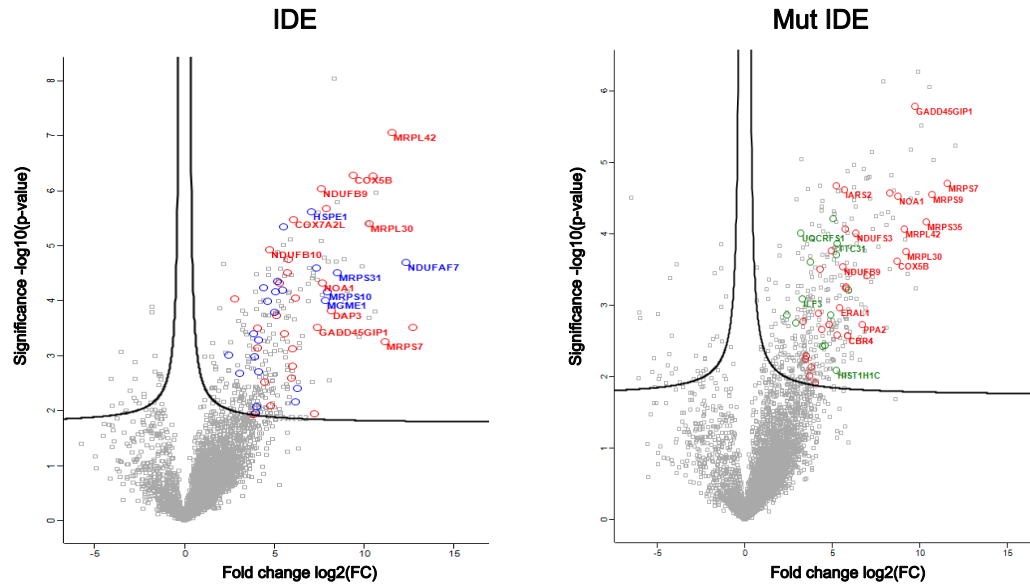

**Figure S2. Volcano plots of IDE and MutIDE proteomic data sets.**

Scatterplots of biotinylated proteins purified from HEK cells expressing IDE- and MutIDE fusion proteins treated with 50  $\mu$ M biotin for 10min; data are based on four independent replicates. Mass spectrometry identified 3779 proteins (FDR=0.05). Among these, 62 proteins (IDE) and 53 proteins (MutIDE), respectively, were enriched significantly relative to both the spatial compartmentalization control (OVA fusion protein) and to control cells not incubated with biotin (n=4 replicates for each condition). Significant enriched proteins common to IDE and MutIDE are marked with red circles, proteins enriched only in IDE cells in blue circles, and proteins enriched only in MutIDE in green circles.

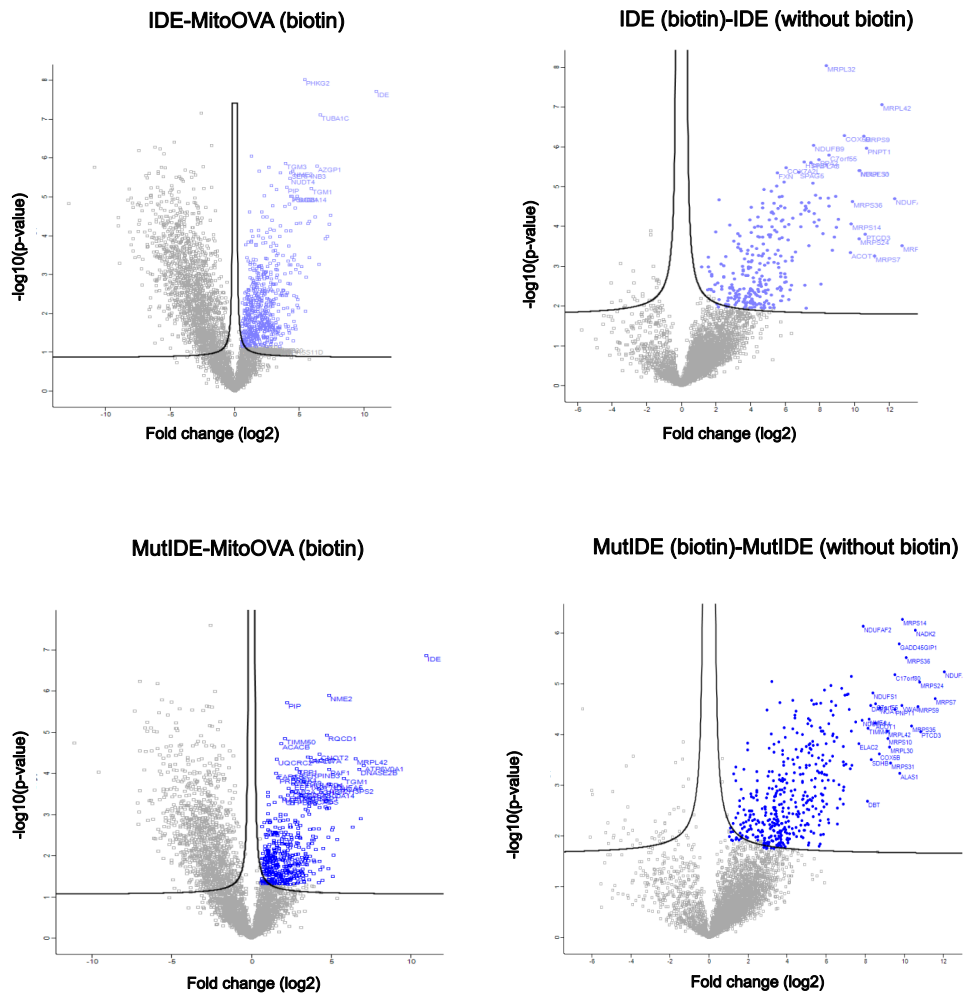

**Figure S3. Volcano plots of IDE and MutlIDE proteomic data sets with comparison to single controls.** Data are represented as in Figure S2 and show scatterplots of proteins from cells expressing IDE wt (top row) or MutlIDE fusion proteins with comparison to OVA controls (left column) or IDE controls without biotin (right).

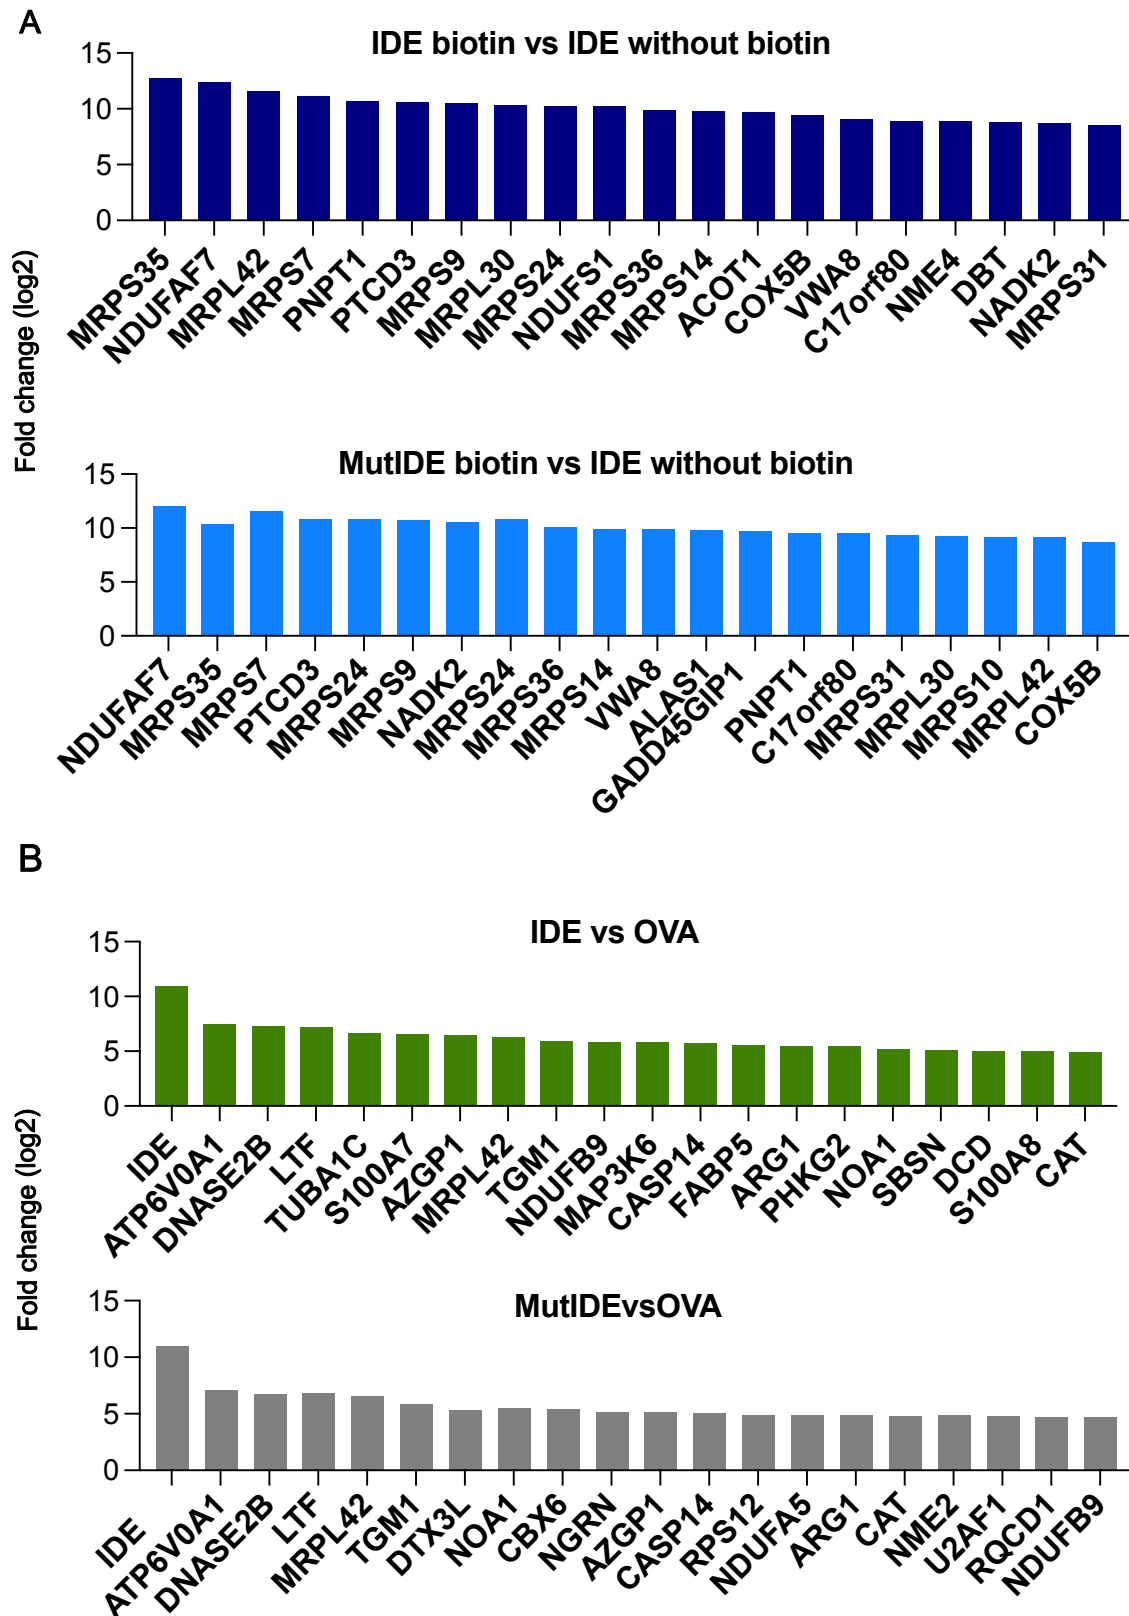

**Figure S4. Top 20 enriched proteins interacting with wt or mutant IDE compared either to OVA or to no-biotin controls.**

**(A)** Interactomes of wt (top) and protease-dead (bottom) IDE identified by comparing samples with and without biotin addition. Minimum fold change was 8.5 (top) and 8.7, respectively. **(B)** Interactomes of wt (top) and protease-dead (bottom) IDE identified by comparing IDE samples with biotin to OVA samples with biotin. Minimum fold change was 4.9 (top) and 4.7, respectively.

A

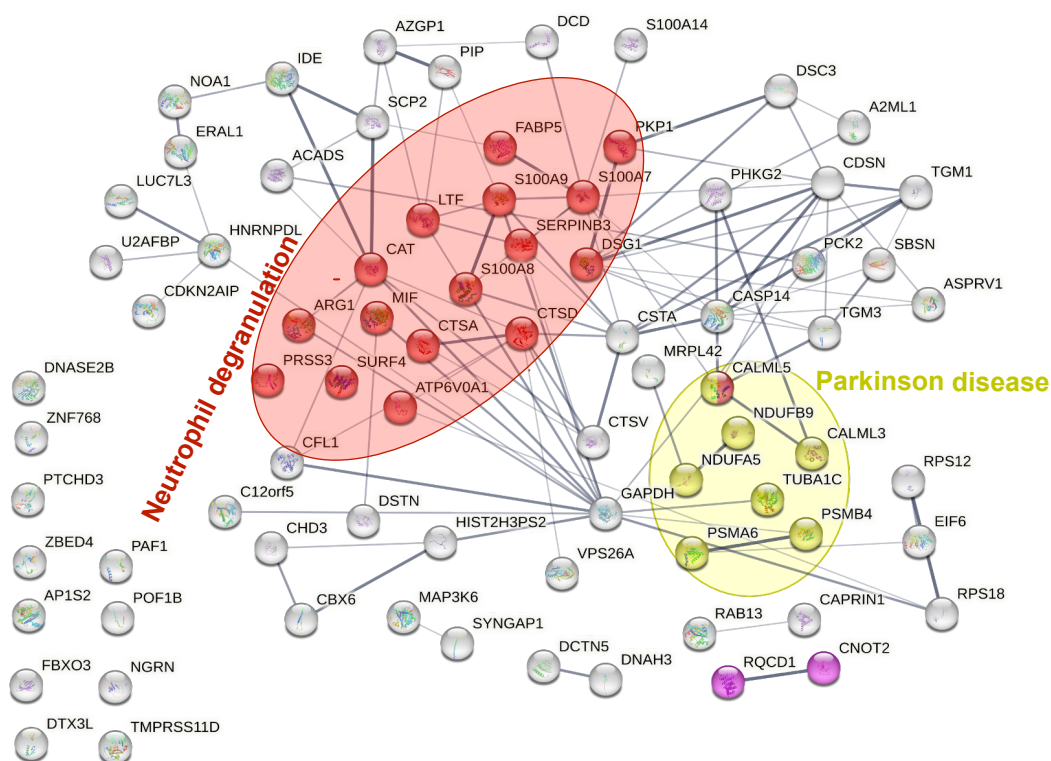

B

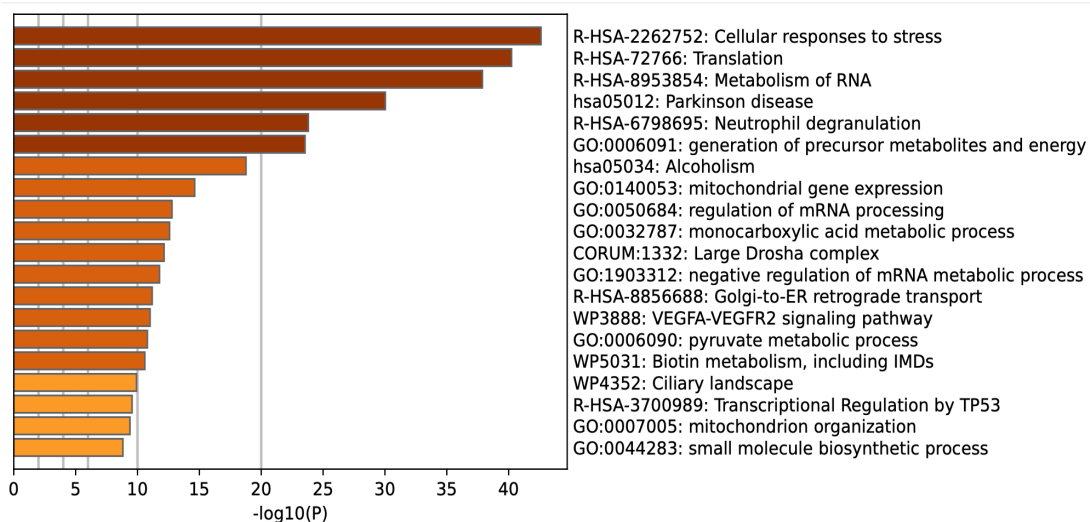

**Figure S5. Functional enrichment analysis of the wt IDEinteractome obtained by comparing cells expressing IDE and OVA incubatedwith biotin.** (A) Functionally associated protein networks in the IDE interactome as identified by STRING analysis. Proteins belonging to the same biological system are labeled with identical color. (C) Top non-redundant enrichment clusters in the IDE interactome, as identified by Metascape. The color scale represents statistical significance levels expressed as  $-\log_{10}$ .
